# Supplementary material for: Synthesis of cerium oxide embedded perovskite type bismuth ferrite nanocomposites for sonophotocatalysis of aqueous micropollutant ibuprofen
Source: Royal Society of Chemistry journal article supplement (doi:10.1039/d2ra07509a), 2023-01-01
Supplement: d2ra07509a1.pdf [file d2ra07509a1.pdf]

## Supplementary Data File

Table 1: Comparison between pseudo-first-order and second-order kinetics applied on different operational parameters

| Sr. No. | Studies      | Conditions                         | Pseudo-First-Order Kinetics |                | Second-Order-Kinetics  |                |
|---------|--------------|------------------------------------|-----------------------------|----------------|------------------------|----------------|
|         |              |                                    | K (min <sup>-1</sup> )      | R <sup>2</sup> | K (min <sup>-1</sup> ) | R <sup>2</sup> |
| 1.      | Pristine BFO | 0.5 gL <sup>-1</sup> Catalyst Dose | 0.0015                      | 0.9025         | 0.0001                 | 0.9005         |
|         | Pristine CeO | 0.5 gL <sup>-1</sup> Catalyst Dose | 0.0166                      | 0.9769         | 0.0038                 | 0.9122         |
| 2.      | Composites   | 2% CeO @ BFO                       | 0.0035                      | 0.9746         | 0.0003                 | 0.9469         |
|         |              | 5% CeO @ BFO                       | 0.0068                      | 0.9532         | 0.0008                 | 0.8621         |
|         |              | 8% CeO @ BFO                       | 0.0060                      | 0.9829         | 0.0007                 | 0.9386         |
|         |              | 10% CeO @ BFO                      | 0.0036                      | 0.9698         | 0.0003                 | 0.9505         |
| 3.      | Dose         | 0.25 gL <sup>-1</sup>              | 0.0064                      | 0.9841         | 0.0006                 | 0.9409         |
|         |              | 0.5 gL <sup>-1</sup>               | 0.0067                      | 0.9595         | 0.0008                 | 0.8855         |
|         |              | 0.75 gL <sup>-1</sup>              | 0.0067                      | 0.9422         | 0.0009                 | 0.8824         |
|         |              | 1 gL <sup>-1</sup>                 | 0.0092                      | 0.9658         | 0.0019                 | 0.8937         |
| 4.      | pH           | 3                                  | 0.0089                      | 0.9887         | 0.0011                 | 0.9142         |
|         |              | 5                                  | 0.0020                      | 0.8657         | 0.0001                 | 0.9060         |
|         |              | 7                                  | 0.0024                      | 0.9725         | 0.0002                 | 0.9874         |
|         |              | 9                                  | 0.0016                      | 0.9389         | 9E-05                  | 0.9549         |
